# Supplementary material for: Characterization of Phase Separated Planar Lipid Bilayer Membrane by Fluorescence Ratio Imaging and Scanning Probe Microscope
Source: MDPI journal article supplement (doi:10.3390/membranes12080770), 2022-08-09
Supplement: s1 [file s1]

# Characterization of Phase Separated Planar Lipid Bilayer Membrane by Fluorescence Ratio Imaging and Scanning Probe Microscope

Yukihiro Okamoto<sup>1\*</sup>, Kaito Hamaguchi<sup>1</sup>, Mayo Watanabe<sup>1</sup>, Nozomi Watanabe<sup>1</sup> and Hiroshi Umakoshi<sup>1</sup>

Division of Chemical Engineering, Graduate School of Engineering Science, Osaka University, 1-3 Machikaneyama-cho, Toyonaka, Osaka 560-8531

\* Correspondence: okamoto.yukihiro.es@osaka-u.ac.jp

The two states of LipiORDER in (POPC/SM/CHOL) SUVs and these peak wavelengths were confirmed with the second derivative fluorescence spectra. The second derivative fluorescence spectra in Supporting Figure 1 were obtained by the Origin graph software (Lightstone, Tokyo, Japan) under following conditions: Savitzky-Golay algorithm, a quadratic polynomial of 15 points, and 0.5 nm interval. The spectra show that the two peaks could be found at 505~515 nm and 560~585 nm ( $L_d$  phase) in (B) (37/32/31), (C) (49/29/22), (D) (60/26/14) and (E) (100/0/0), and only one peak in (A) (POPC/SM/CHOL: 20/40/40), which is from  $L_o$  phase. Hence, the fluorescence ratio value derived from  $L_o$  and  $L_d$  phase is effective for phase state analysis.

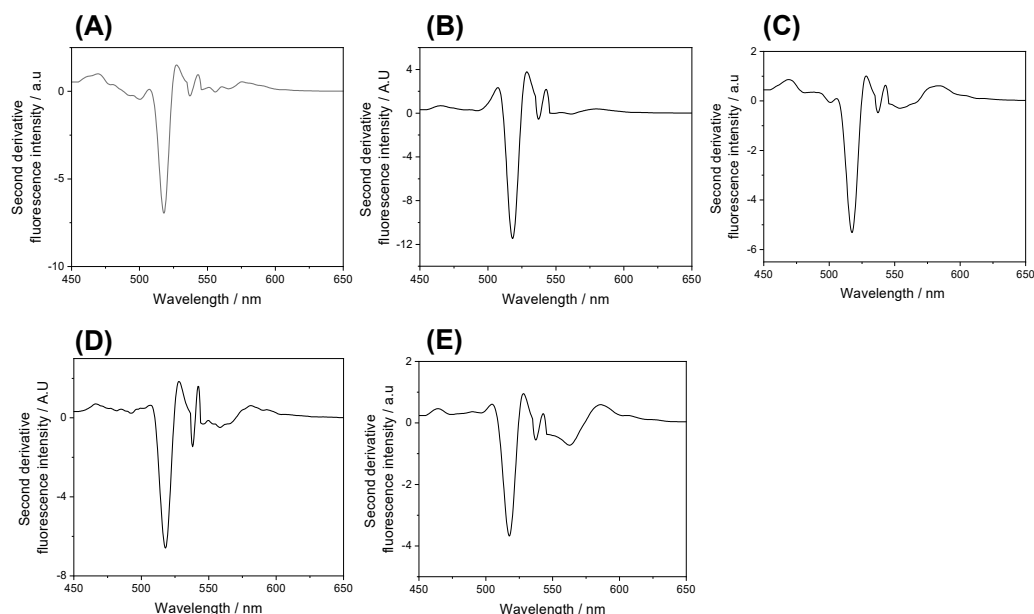

**Supporting Figure 1.** Second derivative fluorescence spectrum of LipiORDER in (POPC/SM/CHOL) SUVs.

Molar ratio (%) of lipid composition (POPC/SM/CHOL): (A) (20/40/40), (B) (37/32/31), (C) (49/29/22), (D) (60/26/14) and (E) (100/0/0).
